# Supplementary material
Source: MDPI journal article supplement (https://www.mdpi.com/2073-4344/11/1/134)
Supplement: s1 [file s1]

## Cascade Biocatalysis Designed for the Allylic Oxidation of $\alpha$ -Pinene

Giulia R. Gheorghita, Cristina Sora, Sabina Ion, Vasile I. Parvulescu and Madalina Tudorache \*

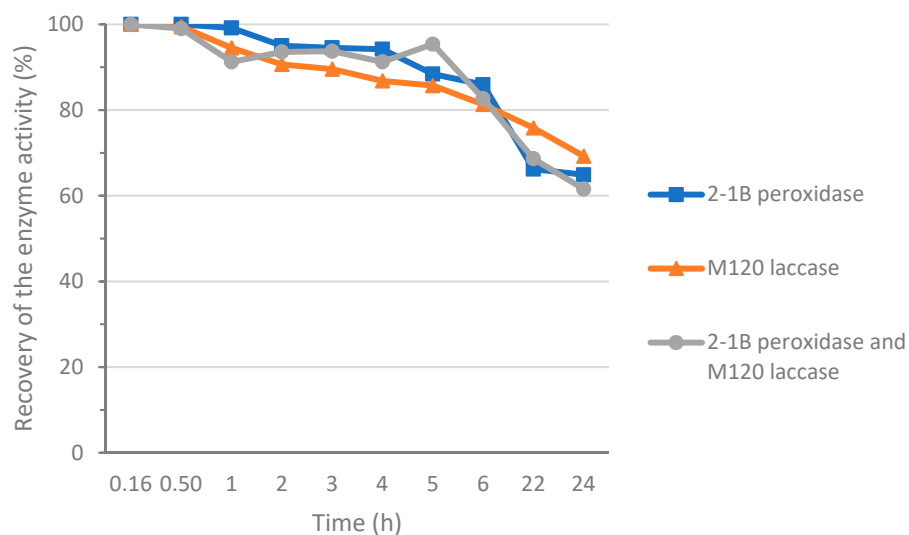

**Figure S1.** Stability tests for 2-1B peroxidase, M120 laccase, and their mixture. Experimental conditions: 1.29 U/mL 2-1B peroxidase and/or 216 POU/mL M120 laccase, and 1.28 M H<sub>2</sub>O<sub>2</sub> in acetate buffer (0.1 M, pH = 5) at 40 °C and 1000 rpm stirring rate; ABTS protocol for the determination of the enzyme activity.
